# Supplementary material
Source: HighWire-hosted journal article supplement (http://jpet.aspetjournals.org/highwire/filestream/142819/field_highwire_adjunct_files/0/250308SupplFigure.pdf)
Supplement: 250308SupplFigure.pdf [file 250308SupplFigure.pdf]

**Article Title:** Interferon- $\alpha$ -mediated Activation of T Cells from Healthy and HIV-infected Individuals is Suppressed by  $\Delta^9$ -Tetrahydrocannabinol<sup>1</sup>

**Authors:** Joseph E. Henriquez, Michael D. Rizzo, Robert B. Crawford, Peter Gulick, & Norbert E. Kaminski,

**Journal:** *Journal of Pharmacology and Experimental Therapeutics*

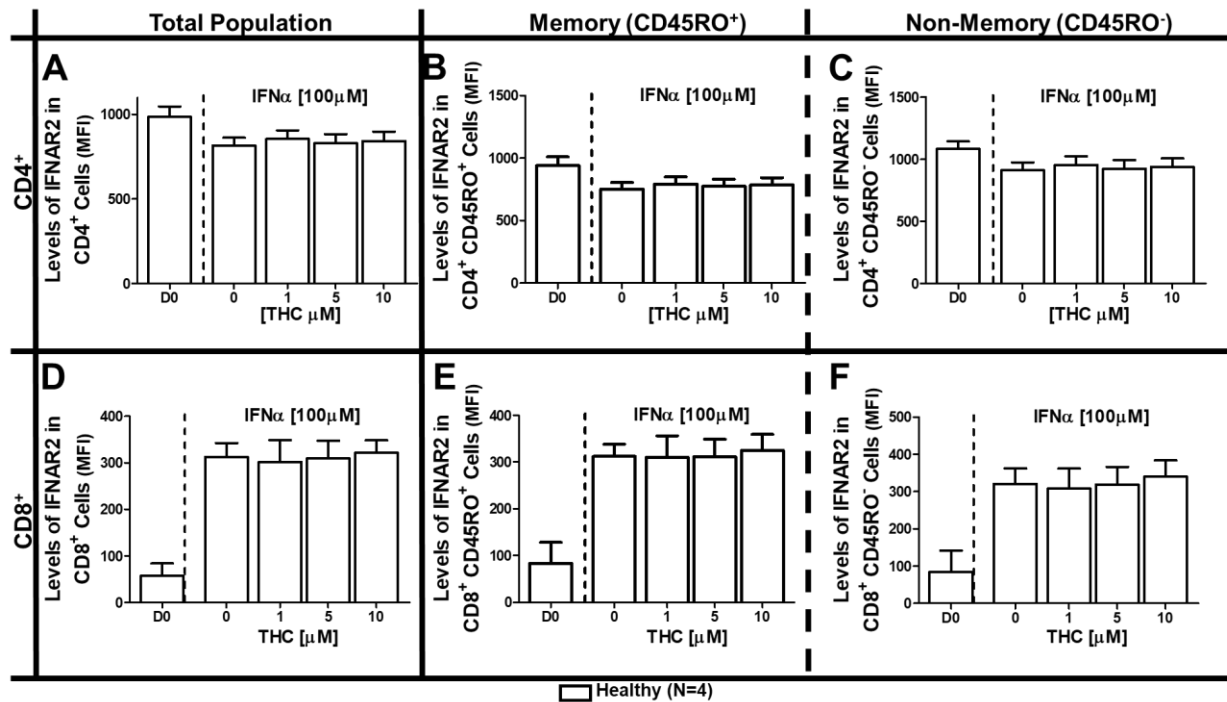

**Supplemental Digital Content 1. Stimulation of T cells with IFN $\alpha$  reduces IFNAR2 expression of CD4<sup>+</sup> cells and enhances expression on CD8<sup>+</sup> T cells while treatment with THC has no effect on IFN $\alpha$ -induced modulation of IFNAR2 expression.** PBMC from healthy and HIV infected donors were isolated through Ficoll Paque<sup>TM</sup> density gradient centrifugation and either immediately stained for CD3, CD4, CD8, CD45RO, and IFNAR2 (D0) or treated with either vehicle (0.026% EtOH) or various concentrations of THC (1, 5, or 10  $\mu$ M) for 30 min. Following treatment, cells were stimulated with 100U/ml of IFN $\alpha$  and incubated for 48 hrs at which point cells were harvested and stained as described above. A-F) The surface expression of IFNAR2 was determined by flow cytometric analysis in healthy: A) total , B) memory and C) non-memory CD4<sup>+</sup> cells; and D) total, E) memory, and F) non-memory CD8<sup>+</sup> cells.
